# Supplementary material
Source: Atypon-hosted journal article supplement (doi:10.1287/ijoc.2025.1159)
Supplement: ijoc.2025.1159.cd.zip [file Table_1_Comparison_of_direct_and_relaxation_algorithms_with_projection.pdf › 2025.1159-main/results/Table_1_Comparison_of_direct_and_relaxation_algorithms_with_projection.pdf]

**Table 1** Comparison of direct and relaxation algorithms with projection

| Group      | Dimension<br>( $m, p, q$ ) | Method     | MPCC |      | WDP  |      | MDP  |      | eMDP |      | TWDP |      | TMDP |      | eTMDP |      | ETMDP |      |      |      |
|------------|----------------------------|------------|------|------|------|------|------|------|------|------|------|------|------|------|-------|------|-------|------|------|------|
|            |                            |            | Dom  | Gap  | Dom   | Gap  | Dom   | Gap  |      |      |
| I          | 100, 110, 20               | Direct     | 18   | 0.63 | 0    | 1.29 | 1    | 1.01 | 0    | 1.12 | 1    | 0.88 | 0    | 0.90 | 0     | 1.51 | 1     | 0.88 | 0    | 1.17 |
|            |                            | Relaxation | 32   | 0.58 | 50   | 0.00 | 49   | 0.00 | 50   | 0.00 | 49   | 0.01 | 50   | 0.00 | 50    | 0.00 | 49    | 0.00 | 50   | 0.00 |
|            | 120, 130, 40               | Direct     | 21   | 0.70 | 0    | 0.81 | 0    | 0.80 | 0    | 1.09 | 0    | 0.75 | 1    | 1.49 | 0     | 1.45 | 0     | 1.29 | 0    | 0.97 |
|            |                            | Relaxation | 29   | 0.77 | 50   | 0.00 | 50   | 0.00 | 50   | 0.00 | 50   | 0.00 | 49   | 0.00 | 49    | 0.00 | 50    | 0.00 | 50   | 0.00 |
|            | 140, 150, 60 <sup>1</sup>  | Direct     | 17   | 0.83 | 0    | 0.84 | 0    | 0.84 | 0    | 0.96 | 0    | 0.85 | 0    | 0.97 | 0     | 0.90 | 0     | 0.95 | 0    | 1.26 |
| Relaxation |                            | 31         | 0.32 | 48   | 0.01 | 48   | 0.01 | 48   | 0.00 | 48   | 0.01 | 48   | 0.00 | 48   | 0.00  | 48   | 0.01  | 48   | 0.00 |      |
| II         | 30, 20, 10 <sup>2</sup>    | Direct     | 9    | 0.72 | 2    | 0.40 | 1    | 0.45 | 1    | 0.43 | 1    | 0.42 | 1    | 0.43 | 0     | 0.41 | 2     | 0.41 | 0    | 0.62 |
|            |                            | Relaxation | 41   | 0.13 | 48   | 0.01 | 50   | 0.00 | 50   | 0.00 | 50   | 0.00 | 49   | 0.01 | 49    | 0.00 | 50    | 0.00 | 49   | 0.03 |
|            | 50, 40, 20                 | Direct     | 12   | 0.85 | 2    | 1.05 | 2    | 0.58 | 1    | 1.17 | 1    | 0.58 | 0    | 0.57 | 1     | 0.72 | 3     | 0.54 | 2    | 0.86 |
|            |                            | Relaxation | 38   | 0.23 | 48   | 0.01 | 48   | 0.02 | 49   | 0.01 | 49   | 0.00 | 49   | 0.00 | 50    | 0.00 | 49    | 0.00 | 47   | 0.00 |
|            | 70, 60, 30                 | Direct     | 25   | 0.26 | 0    | 0.44 | 0    | 0.42 | 0    | 0.47 | 4    | 0.47 | 0    | 0.47 | 1     | 0.40 | 1     | 0.53 | 2    | 0.40 |
| Relaxation |                            | 25         | 0.74 | 50   | 0.00 | 50   | 0.00 | 50   | 0.00 | 47   | 0.05 | 50   | 0.00 | 49   | 0.01  | 49   | 0.02  | 48   | 0.00 |      |
| III        | 30, 20, 10                 | Direct     | 23   | 0.21 | 5    | 0.32 | 3    | 0.33 | 19   | 0.14 | 6    | 0.30 | 3    | 0.27 | 24    | 0.13 | 21    | 0.23 | 40   | 0.01 |
|            |                            | Relaxation | 27   | 0.22 | 46   | 0.00 | 47   | 0.00 | 31   | 0.08 | 45   | 0.00 | 47   | 0.00 | 26    | 0.10 | 29    | 0.22 | 36   | 0.01 |
|            | 50, 40, 20                 | Direct     | 19   | 0.50 | 7    | 0.60 | 5    | 0.67 | 27   | 0.35 | 9    | 0.62 | 8    | 0.70 | 28    | 0.30 | 17    | 0.45 | 29   | 0.03 |
|            |                            | Relaxation | 31   | 0.74 | 43   | 0.01 | 47   | 0.02 | 23   | 0.11 | 41   | 0.04 | 42   | 0.03 | 24    | 0.22 | 33    | 0.43 | 40   | 0.01 |
|            | 70, 60, 30                 | Direct     | 29   | 0.29 | 12   | 0.45 | 9    | 0.91 | 28   | 0.41 | 12   | 0.36 | 13   | 0.33 | 37    | 0.19 | 33    | 0.26 | 29   | 0.11 |
| Relaxation |                            | 21         | 0.48 | 39   | 0.03 | 41   | 0.03 | 22   | 0.22 | 39   | 0.04 | 38   | 0.05 | 13   | 0.41  | 17   | 0.69  | 38   | 0.03 |      |
| Totals     |                            | Direct     | 173  | 0.55 | 28   | 0.69 | 21   | 0.67 | 80   | 0.68 | 30   | 0.58 | 27   | 0.67 | 91    | 0.68 | 79    | 0.60 | 100  | 0.64 |
|            |                            | Relaxation | 275  | 0.47 | 422  | 0.01 | 430  | 0.01 | 370  | 0.05 | 420  | 0.01 | 422  | 0.01 | 359   | 0.08 | 370   | 0.15 | 412  | 0.01 |

<sup>1</sup> The total dominant cases less than the total number 50 means that some examples are infeasible.

<sup>2</sup> The total dominant cases larger than the total number 50 means that, for some examples, both direct and relaxation algorithms generated the best approximation solutions.
