# Supplementary material
Source: Atypon-hosted journal article supplement (doi:10.1287/ijoc.2025.1159)
Supplement: ijoc.2025.1159.cd.zip [file Table_2-4_Overall_comparison_of_nine_reformulations_for_direct_or_relaxation_algorithms_in_Group_I-III.pdf › 2025.1159-main/results/Table_2-4_Overall_comparison_of_nine_reformulations_for_direct_or_relaxation_algorithms_in_Group_I-III.pdf]

**Table 2 Overall comparison of nine reformulations for direct or relaxation algorithms in Group I**

| Dimension                          | Method | Direct |      |          |          |         | Relaxation |      |          |          |         |
|------------------------------------|--------|--------|------|----------|----------|---------|------------|------|----------|----------|---------|
|                                    |        | Dom    | Gap  | Inf      | Inf_Lobj | Time    | Dom        | Gap  | Inf      | Inf_Lobj | Time    |
| $m = 100$<br>$p = 110$<br>$q = 20$ | MPCC   | 2      | 1.02 | 1.31e-06 | 4.94e-08 | 8.88    | 2          | 0.78 | 1.09e+02 | 0.00e+00 | 373.26  |
|                                    | WDP    | 8      | 0.84 | 2.73e-04 | 5.07e-08 | 12.41   | 10         | 0.18 | 1.59e-08 | 1.37e-08 | 148.50  |
|                                    | MDP    | 6      | 0.96 | 2.42e-04 | 8.26e-08 | 15.43   | 13         | 0.14 | 2.49e-04 | 9.19e-09 | 193.05  |
|                                    | eMDP   | 2      | 1.20 | 1.93e-06 | 9.09e-08 | 71.15   | 9          | 0.34 | 1.44e-07 | 5.06e-08 | 532.70  |
|                                    | TWDP   | 13     | 0.55 | 1.29e-04 | 4.11e-08 | 14.99   | 10         | 0.19 | 1.48e-04 | 1.12e-08 | 179.93  |
|                                    | TMDP   | 8      | 1.18 | 7.74e-05 | 1.45e-07 | 14.04   | 14         | 0.14 | 1.36e-08 | 1.32e-08 | 178.62  |
|                                    | eTMDP  | 3      | 1.56 | 9.00e-07 | 1.53e-08 | 65.18   | 5          | 0.40 | 7.04e-08 | 1.30e-08 | 470.67  |
|                                    | ETMDP  | 14     | 0.82 | 1.33e-04 | 4.76e-08 | 25.28   | 15         | 0.13 | 3.12e-05 | 9.91e-09 | 212.36  |
|                                    | eETMDP | 0      | 1.48 | 3.17e-06 | 6.07e-08 | 17.46   | 3          | 0.36 | 3.09e-08 | 9.53e-09 | 53.84   |
| $m = 120$<br>$p = 130$<br>$q = 40$ | MPCC   | 3      | 0.78 | 5.79e-05 | 2.43e-08 | 9.66    | 1          | 0.83 | 8.74e+01 | 0.00e+00 | 526.49  |
|                                    | WDP    | 9      | 0.70 | 4.33e-06 | 1.93e-08 | 18.85   | 8          | 0.17 | 1.47e-08 | 1.08e-08 | 264.25  |
|                                    | MDP    | 8      | 0.52 | 1.43e-03 | 9.35e-08 | 28.83   | 9          | 0.15 | 6.51e-04 | 1.03e-08 | 271.29  |
|                                    | eMDP   | 3      | 0.94 | 4.05e-01 | 2.37e-07 | 196.65  | 9          | 0.25 | 9.67e-08 | 1.99e-08 | 1252.83 |
|                                    | TWDP   | 14     | 0.47 | 2.74e-05 | 1.47e-08 | 22.38   | 19         | 0.12 | 3.26e-08 | 1.04e-08 | 250.98  |
|                                    | TMDP   | 10     | 0.65 | 3.08e-05 | 2.69e-08 | 30.29   | 8          | 0.15 | 3.87e-05 | 1.23e-07 | 335.61  |
|                                    | eTMDP  | 6      | 0.99 | 4.56e-01 | 7.24e-08 | 156.55  | 8          | 0.26 | 8.15e-08 | 1.68e-08 | 1270.74 |
|                                    | ETMDP  | 12     | 0.60 | 9.95e-05 | 2.14e-07 | 31.86   | 10         | 0.13 | 4.71e-04 | 1.00e-08 | 290.53  |
|                                    | eETMDP | 1      | 1.18 | 6.35e-01 | 1.30e-07 | 56.46   | 7          | 0.28 | 1.61e-08 | 1.23e-08 | 107.06  |
| $m = 140$<br>$p = 150$<br>$q = 60$ | MPCC   | 5      | 0.41 | 3.67e-02 | 1.33e-08 | 18.90   | 3          | 0.75 | 4.83e+01 | 1.08e-09 | 593.43  |
|                                    | WDP    | 11     | 0.31 | 3.74e-02 | 1.95e-07 | 46.36   | 14         | 0.22 | 3.41e-02 | 1.93e-07 | 376.51  |
|                                    | MDP    | 5      | 0.37 | 3.63e-02 | 2.82e-08 | 35.14   | 11         | 0.16 | 3.41e-02 | 9.92e-09 | 332.34  |
|                                    | eMDP   | 8      | 0.55 | 8.49e+00 | 2.00e+00 | 1090.96 | 8          | 0.20 | 3.38e-02 | 3.01e-08 | 2691.55 |
|                                    | TWDP   | 5      | 0.35 | 3.75e-02 | 1.02e-07 | 40.47   | 6          | 0.29 | 3.41e-02 | 1.00e-08 | 321.95  |
|                                    | TMDP   | 7      | 0.34 | 3.65e-02 | 3.16e-08 | 38.78   | 10         | 0.17 | 3.63e-02 | 1.32e-08 | 354.44  |
|                                    | eTMDP  | 6      | 0.51 | 6.16e+00 | 2.87e-08 | 862.49  | 7          | 0.26 | 8.27e-02 | 4.28e-08 | 2992.28 |
|                                    | ETMDP  | 17     | 0.33 | 3.69e-02 | 1.36e-08 | 77.10   | 11         | 0.15 | 3.38e-02 | 8.69e-09 | 370.36  |
|                                    | eETMDP | 1      | 0.61 | 6.08e+00 | 4.04e-08 | 454.82  | 7          | 0.22 | 3.25e-02 | 2.13e-08 | 526.85  |

**Table 3 Overall comparison of nine reformulations for direct or relaxation algorithms in Group II**

| Dimension                          | Method | Direct |      |          |          |       | Relaxation |      |          |          |        |
|------------------------------------|--------|--------|------|----------|----------|-------|------------|------|----------|----------|--------|
|                                    |        | Dom    | Gap  | Inf      | Inf.Lobj | Time  | Dom        | Gap  | Inf      | Inf.Lobj | Time   |
| $m = 100$<br>$p = 110$<br>$q = 20$ | MPCC   | 10     | 0.30 | 4.00e+00 | 6.39e-07 | 0.98  | 10         | 0.24 | 1.11e+02 | 1.68e-12 | 40.40  |
|                                    | WDP    | 9      | 0.22 | 2.01e+00 | 2.00e+00 | 1.78  | 19         | 0.12 | 1.37e-05 | 4.48e-07 | 24.69  |
|                                    | MDP    | 9      | 0.29 | 2.00e+00 | 2.00e+00 | 1.87  | 26         | 0.10 | 4.02e-07 | 3.82e-07 | 16.63  |
|                                    | eMDP   | 4      | 0.33 | 8.02e-07 | 6.67e-07 | 2.31  | 11         | 0.16 | 3.67e-07 | 3.06e-07 | 23.05  |
|                                    | TWDP   | 6      | 0.24 | 1.71e-05 | 5.59e-07 | 1.79  | 25         | 0.11 | 1.87e-05 | 4.24e-07 | 25.87  |
|                                    | TMDP   | 7      | 0.27 | 4.00e+00 | 4.00e+00 | 1.96  | 21         | 0.11 | 4.73e-07 | 4.67e-07 | 15.78  |
|                                    | eTMDP  | 4      | 0.32 | 1.67e-06 | 5.85e-07 | 2.34  | 8          | 0.20 | 3.39e-07 | 3.07e-07 | 24.53  |
|                                    | ETMDP  | 4      | 0.25 | 2.01e+00 | 2.00e+00 | 2.17  | 21         | 0.14 | 4.14e-07 | 3.97e-07 | 17.22  |
|                                    | eETMDP | 0      | 0.54 | 1.74e-06 | 5.87e-07 | 0.86  | 6          | 0.18 | 2.94e-07 | 2.23e-07 | 9.49   |
| $m = 120$<br>$p = 130$<br>$q = 40$ | MPCC   | 6      | 0.47 | 1.83e-06 | 1.52e-06 | 1.87  | 7          | 0.48 | 2.27e+02 | 0.00e+00 | 102.78 |
|                                    | WDP    | 8      | 0.42 | 5.14e-04 | 7.67e-07 | 6.13  | 16         | 0.13 | 1.76e-05 | 9.58e-07 | 76.20  |
|                                    | MDP    | 6      | 0.37 | 2.00e+00 | 1.10e-06 | 6.51  | 13         | 0.15 | 5.12e-05 | 1.01e-06 | 73.34  |
|                                    | eMDP   | 4      | 0.57 | 2.42e-05 | 1.59e-06 | 8.64  | 3          | 0.23 | 2.44e-06 | 1.07e-06 | 153.82 |
|                                    | TWDP   | 5      | 0.42 | 2.00e+00 | 2.00e+00 | 5.46  | 8          | 0.14 | 1.17e-06 | 1.16e-06 | 85.36  |
|                                    | TMDP   | 10     | 0.33 | 2.00e+00 | 2.00e+00 | 8.46  | 11         | 0.10 | 2.68e-05 | 1.14e-06 | 64.59  |
|                                    | eTMDP  | 2      | 0.65 | 3.10e-06 | 1.15e-06 | 9.33  | 7          | 0.18 | 1.23e-06 | 1.17e-06 | 173.87 |
|                                    | ETMDP  | 12     | 0.24 | 2.00e+00 | 2.00e+00 | 7.03  | 12         | 0.12 | 7.82e-07 | 7.70e-07 | 49.85  |
|                                    | eETMDP | 0      | 0.90 | 2.00e+00 | 2.00e+00 | 3.33  | 2          | 0.26 | 1.28e-06 | 9.14e-07 | 36.47  |
| $m = 140$<br>$p = 150$<br>$q = 60$ | MPCC   | 7      | 0.38 | 3.29e-06 | 1.56e-06 | 3.15  | 1          | 0.72 | 2.02e+02 | 0.00e+00 | 200.43 |
|                                    | WDP    | 8      | 0.18 | 4.81e-05 | 1.19e-06 | 12.14 | 14         | 0.07 | 1.09e-04 | 1.83e-06 | 262.78 |
|                                    | MDP    | 11     | 0.16 | 1.60e-04 | 9.96e-07 | 20.97 | 15         | 0.07 | 6.07e-05 | 2.06e-06 | 236.74 |
|                                    | eMDP   | 4      | 0.30 | 6.58e-06 | 1.68e-06 | 38.90 | 8          | 0.15 | 1.86e-06 | 1.75e-06 | 741.12 |
|                                    | TWDP   | 6      | 0.24 | 4.02e+00 | 4.00e+00 | 12.52 | 15         | 0.10 | 4.18e-05 | 2.54e-06 | 294.55 |
|                                    | TMDP   | 15     | 0.14 | 4.00e+00 | 4.00e+00 | 16.30 | 8          | 0.11 | 1.55e-05 | 1.75e-06 | 261.06 |
|                                    | eTMDP  | 2      | 0.42 | 6.23e-06 | 1.72e-06 | 35.57 | 10         | 0.16 | 1.90e-06 | 1.87e-06 | 639.51 |
|                                    | ETMDP  | 14     | 0.16 | 1.34e-02 | 8.69e-07 | 19.91 | 11         | 0.11 | 2.00e+00 | 2.00e+00 | 302.78 |
|                                    | eETMDP | 1      | 0.70 | 4.75e-06 | 1.57e-06 | 6.84  | 6          | 0.18 | 2.64e-06 | 1.69e-06 | 89.26  |

**Table 4 Overall comparison of nine reformulations for direct or relaxation algorithms in Group III**

| Dimension                          | Method | Direct |      |          |          |       | Relaxation |      |          |          |         |
|------------------------------------|--------|--------|------|----------|----------|-------|------------|------|----------|----------|---------|
|                                    |        | Dom    | Gap  | Inf      | Inf.Lobj | Time  | Dom        | Gap  | Inf      | Inf.Lobj | Time    |
| $m = 100$<br>$p = 110$<br>$q = 20$ | MPCC   | 10     | 0.27 | 2.00e+00 | 2.00e+00 | 1.53  | 11         | 0.37 | 1.14e+02 | 1.30e-13 | 79.20   |
|                                    | WDP    | 4      | 0.19 | 3.72e-04 | 1.41e-07 | 2.79  | 19         | 0.04 | 4.58e-05 | 3.04e-07 | 143.44  |
|                                    | MDP    | 5      | 0.22 | 1.83e-04 | 2.41e-07 | 2.59  | 14         | 0.06 | 4.72e-03 | 3.73e-07 | 119.53  |
|                                    | eMDP   | 5      | 0.27 | 8.21e-05 | 5.52e-07 | 4.46  | 1          | 0.37 | 2.52e-04 | 2.17e-07 | 118.22  |
|                                    | TWDP   | 6      | 0.21 | 2.71e-04 | 3.54e-07 | 2.40  | 6          | 0.09 | 1.00e-04 | 4.55e-07 | 131.82  |
|                                    | TMDP   | 9      | 0.18 | 2.00e+00 | 2.00e+00 | 2.61  | 5          | 0.09 | 4.78e-05 | 8.35e-07 | 126.57  |
|                                    | eTMDP  | 12     | 0.22 | 2.00e+00 | 3.80e-07 | 3.92  | 2          | 0.33 | 4.67e-06 | 2.22e-07 | 103.40  |
|                                    | ETMDP  | 1      | 0.22 | 1.33e-04 | 6.30e-07 | 2.63  | 11         | 0.37 | 1.14e+02 | 3.39e-14 | 97.90   |
|                                    | eETMDP | 0      | 0.46 | 2.80e-07 | 1.86e-07 | 1.15  | 0          | 0.55 | 1.14e-07 | 7.06e-08 | 25.53   |
| $m = 120$<br>$p = 130$<br>$q = 40$ | MPCC   | 14     | 0.52 | 5.25e-04 | 7.82e-07 | 3.59  | 15         | 0.71 | 1.77e+02 | 2.35e-13 | 160.02  |
|                                    | WDP    | 2      | 0.76 | 2.00e+00 | 5.60e-07 | 6.39  | 14         | 0.19 | 1.02e-04 | 3.76e-07 | 337.85  |
|                                    | MDP    | 0      | 0.66 | 2.08e-04 | 7.17e-07 | 8.40  | 10         | 0.18 | 2.00e+00 | 5.94e-07 | 264.95  |
|                                    | eMDP   | 9      | 0.92 | 3.08e-04 | 2.51e-07 | 21.09 | 2          | 0.75 | 3.18e-05 | 1.89e-07 | 523.77  |
|                                    | TWDP   | 7      | 0.72 | 1.52e-03 | 3.64e-07 | 6.71  | 6          | 0.29 | 1.12e-04 | 6.74e-07 | 318.56  |
|                                    | TMDP   | 3      | 0.75 | 2.66e-03 | 5.04e-07 | 7.97  | 3          | 0.28 | 2.60e-04 | 7.12e-07 | 288.93  |
|                                    | eTMDP  | 8      | 0.88 | 2.01e+00 | 5.04e-07 | 20.50 | 3          | 0.73 | 2.85e-05 | 2.08e-07 | 517.29  |
|                                    | ETMDP  | 8      | 0.44 | 2.13e-03 | 4.34e-07 | 7.10  | 15         | 0.71 | 1.77e+02 | 4.57e-13 | 199.16  |
|                                    | eETMDP | 0      | 1.14 | 5.44e-07 | 2.10e-07 | 2.80  | 0          | 0.94 | 1.79e-07 | 1.42e-07 | 62.46   |
| $m = 140$<br>$p = 150$<br>$q = 60$ | MPCC   | 12     | 0.55 | 4.00e+00 | 4.67e-07 | 8.27  | 10         | 0.78 | 1.78e+02 | 0.00e+00 | 323.23  |
|                                    | WDP    | 6      | 0.74 | 1.70e-04 | 7.24e-07 | 18.99 | 17         | 0.14 | 3.17e-04 | 3.16e-07 | 739.62  |
|                                    | MDP    | 3      | 0.61 | 1.40e+00 | 3.77e-07 | 17.12 | 12         | 0.14 | 1.12e-04 | 3.46e-07 | 664.61  |
|                                    | eMDP   | 7      | 0.82 | 4.00e+00 | 4.00e+00 | 86.68 | 2          | 0.50 | 4.72e-05 | 3.63e-07 | 1788.77 |
|                                    | TWDP   | 4      | 0.58 | 1.18e-03 | 1.13e-07 | 15.63 | 3          | 0.19 | 3.52e-04 | 2.32e-07 | 859.73  |
|                                    | TMDP   | 4      | 0.59 | 2.68e-04 | 2.43e-07 | 24.37 | 9          | 0.19 | 2.00e+00 | 5.16e-07 | 810.08  |
|                                    | eTMDP  | 6      | 0.38 | 5.35e-02 | 4.68e-07 | 72.42 | 2          | 0.55 | 2.00e+00 | 2.00e+00 | 2021.96 |
|                                    | ETMDP  | 7      | 0.57 | 3.67e-03 | 4.89e-07 | 21.52 | 10         | 0.78 | 1.80e+02 | 0.00e+00 | 398.94  |
|                                    | eETMDP | 1      | 1.10 | 2.00e+00 | 2.00e+00 | 14.31 | 1          | 0.88 | 3.09e-07 | 4.56e-08 | 154.47  |
