# Supplementary material
Source: Atypon-hosted journal article supplement (doi:10.1287/ijoc.2025.1159)
Supplement: ijoc.2025.1159.cd.zip [file Table_5_Overall_comparison_of_nine_reformulations_for_direct_or_relaxation_algorithms_in_all_groups.pdf › 2025.1159-main/results/Table_5_Overall_comparison_of_nine_reformulations_for_direct_or_relaxation_algorithms_in_all_groups.pdf]

**Table 5 Overall comparison of nine reformulations for direct or relaxation algorithms in all groups**

| Method | Direct |      |          |          | Relaxation |      |          |          |
|--------|--------|------|----------|----------|------------|------|----------|----------|
|        | Dom    | Gap  | Inf      | Inf_Lobj | Dom        | Gap  | Inf      | Inf_Lobj |
| MPCC   | 69     | 0.52 | 1.12e+00 | 2.22e-01 | 60         | 0.63 | 1.39e+02 | 1.20e-10 |
| WDP    | 65     | 0.48 | 4.50e-01 | 2.22e-01 | 131        | 0.14 | 3.86e-03 | 4.94e-07 |
| MDP    | 53     | 0.46 | 6.05e-01 | 2.22e-01 | 123        | 0.13 | 2.27e-01 | 5.34e-07 |
| eMDP   | 46     | 0.66 | 1.43e+00 | 6.67e-01 | 53         | 0.33 | 3.79e-03 | 4.44e-07 |
| TWDP   | 66     | 0.42 | 6.73e-01 | 6.67e-01 | 98         | 0.17 | 3.88e-03 | 6.13e-07 |
| TMDP   | 73     | 0.49 | 1.34e+00 | 1.33e+00 | 89         | 0.15 | 2.26e-01 | 6.19e-07 |
| eTMDP  | 49     | 0.66 | 1.19e+00 | 5.47e-07 | 52         | 0.34 | 2.31e-01 | 4.80e-07 |
| ETMDP  | 89     | 0.40 | 4.52e-01 | 4.44e-01 | 116        | 0.29 | 5.26e+01 | 1.49e-07 |
| eETMDP | 4      | 0.90 | 1.19e+00 | 4.44e-01 | 32         | 0.43 | 3.61e-03 | 3.48e-07 |
