# Supplementary material
Source: Atypon-hosted journal article supplement (doi:10.1287/ijoc.2025.1159)
Supplement: ijoc.2025.1159.cd.zip [file Table_6-7_Pairwise_comparison_of_dominant_cases_for_direct&relaxation_algorithms_in_three_groups.pdf › 2025.1159-main/results/Table_6-7_Pairwise_comparison_of_dominant_cases_for_direct&relaxation_algorithms_in_three_groups.pdf]

**Table 6** Pairwise comparison of dominant cases ( $\frac{A}{B}$ ) for direct algorithms in three groups

| $\begin{smallmatrix} B \\ A \end{smallmatrix}$ | MPCC                                           | WDP                                            | MDP                                            | eMDP                                          | TWDP                                           | TMDP                                           | eTMDP                                         | ETMDP                                          |
|------------------------------------------------|------------------------------------------------|------------------------------------------------|------------------------------------------------|-----------------------------------------------|------------------------------------------------|------------------------------------------------|-----------------------------------------------|------------------------------------------------|
| WDP                                            | $\frac{105}{67}/\frac{90}{64}/\frac{71}{79}$   | -                                              | -                                              | -                                             | -                                              | -                                              | -                                             | -                                              |
| MDP                                            | $\frac{101}{66}/\frac{93}{63}/\frac{73}{78}$   | $\frac{90}{91}/\frac{76}{79}/\frac{77}{78}$    | -                                              | -                                             | -                                              | -                                              | -                                             | -                                              |
| eMDP                                           | $\frac{55}{94}/\frac{82}{70}/\frac{69}{82}$    | $\frac{42}{107}/\frac{53}{99}/\frac{64}{87}$   | $\frac{44}{106}/\frac{57}{95}/\frac{59}{91}$   | -                                             | -                                              | -                                              | -                                             | -                                              |
| TWDP                                           | $\frac{118}{57}/\frac{92}{64}/\frac{78}{73}$   | $\frac{99}{81}/\frac{81}{76}/\frac{80}{77}$    | $\frac{99}{81}/\frac{62}{96}/\frac{80}{76}$    | $\frac{109}{40}/\frac{95}{57}/\frac{86}{65}$  | -                                              | -                                              | -                                             | -                                              |
| TMDP                                           | $\frac{110}{63}/\frac{98}{80}/\frac{80}{71}$   | $\frac{95}{89}/\frac{88}{72}/\frac{85}{69}$    | $\frac{99}{86}/\frac{77}{77}/\frac{81}{73}$    | $\frac{107}{42}/\frac{98}{54}/\frac{85}{65}$  | $\frac{85}{92}/\frac{84}{71}/\frac{84}{73}$    | -                                              | -                                             | -                                              |
| eTMDP                                          | $\frac{61}{88}/\frac{73}{80}/\frac{77}{74}$    | $\frac{55}{94}/\frac{44}{107}/\frac{69}{82}$   | $\frac{52}{98}/\frac{43}{109}/\frac{75}{75}$   | $\frac{89}{72}/\frac{66}{85}/\frac{79}{73}$   | $\frac{41}{109}/\frac{53}{99}/\frac{72}{80}$   | $\frac{47}{103}/\frac{45}{106}/\frac{72}{79}$  | -                                             | -                                              |
| ETMDP                                          | $\frac{110}{62}/\frac{100}{56}/\frac{78}{74}$  | $\frac{100}{77}/\frac{84}{71}/\frac{85}{73}$   | $\frac{104}{78}/\frac{85}{76}/\frac{83}{74}$   | $\frac{110}{39}/\frac{105}{50}/\frac{87}{63}$ | $\frac{93}{89}/\frac{97}{59}/\frac{82}{76}$    | $\frac{102}{79}/\frac{91}{68}/\frac{80}{74}$   | $\frac{107}{43}/\frac{106}{44}/\frac{81}{70}$ | -                                              |
| eETMDP                                         | $\frac{22}{130}/\frac{27}{129}/\frac{32}{119}$ | $\frac{14}{140}/\frac{13}{138}/\frac{14}{139}$ | $\frac{18}{135}/\frac{16}{137}/\frac{15}{135}$ | $\frac{63}{86}/\frac{26}{126}/\frac{36}{115}$ | $\frac{12}{139}/\frac{16}{136}/\frac{18}{134}$ | $\frac{19}{136}/\frac{19}{132}/\frac{19}{134}$ | $\frac{13}{87}/\frac{11}{118}/\frac{15}{124}$ | $\frac{14}{137}/\frac{12}{141}/\frac{14}{138}$ |

**Table 7** Pairwise comparison of dominant cases ( $\frac{A}{B}$ ) for relaxation algorithms in three groups

| $\begin{smallmatrix} B \\ A \end{smallmatrix}$ | MPCC                                            | WDP                                             | MDP                                            | eMDP                                           | TWDP                                            | TMDP                                           | eTMDP                                         | ETMDP                                         |
|------------------------------------------------|-------------------------------------------------|-------------------------------------------------|------------------------------------------------|------------------------------------------------|-------------------------------------------------|------------------------------------------------|-----------------------------------------------|-----------------------------------------------|
| WDP                                            | $\frac{133}{15}/\frac{128}{26}/\frac{112}{38}$  | -                                               | -                                              | -                                              | -                                               | -                                              | -                                             | -                                             |
| MDP                                            | $\frac{139}{9}/\frac{126}{29}/\frac{111}{39}$   | $\frac{100}{86}/\frac{104}{97}/\frac{71}{95}$   | -                                              | -                                              | -                                               | -                                              | -                                             | -                                             |
| eMDP                                           | $\frac{132}{16}/\frac{114}{37}/\frac{71}{79}$   | $\frac{60}{98}/\frac{57}{113}/\frac{13}{137}$   | $\frac{50}{108}/\frac{58}{112}/\frac{12}{138}$ | -                                              | -                                               | -                                              | -                                             | -                                             |
| TWDP                                           | $\frac{136}{12}/\frac{127}{28}/\frac{101}{49}$  | $\frac{91}{94}/\frac{106}{98}/\frac{53}{109}$   | $\frac{92}{90}/\frac{105}{100}/\frac{54}{106}$ | $\frac{103}{51}/\frac{106}{61}/\frac{133}{17}$ | -                                               | -                                              | -                                             | -                                             |
| TMDP                                           | $\frac{135}{13}/\frac{129}{25}/\frac{100}{50}$  | $\frac{98}{92}/\frac{101}{105}/\frac{53}{107}$  | $\frac{93}{90}/\frac{99}{102}/\frac{58}{102}$  | $\frac{99}{55}/\frac{112}{59}/\frac{132}{19}$  | $\frac{100}{90}/\frac{103}{105}/\frac{74}{90}$  | -                                              | -                                             | -                                             |
| eTMDP                                          | $\frac{127}{21}/\frac{115}{36}/\frac{70}{80}$   | $\frac{60}{100}/\frac{62}{108}/\frac{13}{137}$  | $\frac{49}{110}/\frac{63}{110}/\frac{11}{140}$ | $\frac{79}{86}/\frac{86}{87}/\frac{81}{73}$    | $\frac{54}{102}/\frac{67}{108}/\frac{17}{133}$  | $\frac{60}{96}/\frac{65}{104}/\frac{17}{133}$  | -                                             | -                                             |
| ETMDP                                          | $\frac{138}{10}/\frac{124}{29}/\frac{147}{148}$ | $\frac{100}{84}/\frac{104}{103}/\frac{38}{112}$ | $\frac{94}{87}/\frac{103}{105}/\frac{39}{111}$ | $\frac{104}{52}/\frac{109}{64}/\frac{79}{71}$  | $\frac{100}{94}/\frac{105}{108}/\frac{49}{101}$ | $\frac{98}{99}/\frac{109}{113}/\frac{50}{100}$ | $\frac{103}{53}/\frac{103}{67}/\frac{80}{70}$ | -                                             |
| eETMDP                                         | $\frac{128}{20}/\frac{111}{39}/\frac{53}{97}$   | $\frac{51}{101}/\frac{44}{119}/\frac{2}{148}$   | $\frac{39}{112}/\frac{43}{121}/\frac{2}{148}$  | $\frac{73}{80}/\frac{70}{98}/\frac{25}{126}$   | $\frac{42}{109}/\frac{42}{121}/\frac{2}{148}$   | $\frac{39}{113}/\frac{39}{122}/\frac{2}{148}$  | $\frac{74}{86}/\frac{71}{95}/\frac{32}{120}$  | $\frac{39}{112}/\frac{48}{116}/\frac{53}{97}$ |
