# Supplementary material
Source: Atypon-hosted journal article supplement (doi:10.1287/ijoc.2025.1159)
Supplement: ijoc.2025.1159.cd.zip [file Table_8-9_Pairwise_comparison_of_gapvalues_for_direct&relaxation_algorithms_in_three_groups.pdf › 2025.1159-main/results/Table_8-9_Pairwise_comparison_of_gapvalues_for_direct&relaxation_algorithms_in_three_groups.pdf]

**Table 8** Pairwise comparison of gap values ( $\frac{A}{B}$ ) for direct algorithms in three groups

| $\begin{smallmatrix} B \\ A \end{smallmatrix}$ | MPCC                                                        | WDP                                                         | MDP                                                         | eMDP                                                        | TWDP                                                        | TMDP                                                        | eTMDP                                                       | ETMDP                                                       |
|------------------------------------------------|-------------------------------------------------------------|-------------------------------------------------------------|-------------------------------------------------------------|-------------------------------------------------------------|-------------------------------------------------------------|-------------------------------------------------------------|-------------------------------------------------------------|-------------------------------------------------------------|
| WDP                                            | $\frac{0.98}{1.08} / \frac{0.09}{0.27} / \frac{0.55}{0.59}$ | -                                                           | -                                                           | -                                                           | -                                                           | -                                                           | -                                                           | -                                                           |
| MDP                                            | $\frac{0.89}{0.93} / \frac{0.14}{0.30} / \frac{0.52}{0.64}$ | $\frac{0.90}{0.87} / \frac{0.17}{0.16} / \frac{0.46}{0.59}$ | -                                                           | -                                                           | -                                                           | -                                                           | -                                                           | -                                                           |
| eMDP                                           | $\frac{1.04}{1.02} / \frac{0.20}{0.26} / \frac{0.70}{0.56}$ | $\frac{1.00}{0.89} / \frac{0.26}{0.26} / \frac{0.62}{0.55}$ | $\frac{0.98}{0.90} / \frac{0.27}{0.15} / \frac{0.61}{0.48}$ | -                                                           | -                                                           | -                                                           | -                                                           | -                                                           |
| TWDP                                           | $\frac{0.83}{0.88} / \frac{0.14}{0.26} / \frac{0.64}{0.67}$ | $\frac{0.85}{0.86} / \frac{0.13}{0.12} / \frac{0.47}{0.61}$ | $\frac{0.85}{0.88} / \frac{0.18}{0.13} / \frac{0.58}{0.49}$ | $\frac{0.86}{0.95} / \frac{0.22}{0.27} / \frac{0.45}{0.64}$ | -                                                           | -                                                           | -                                                           | -                                                           |
| TMDP                                           | $\frac{0.91}{0.96} / \frac{0.09}{0.31} / \frac{0.74}{0.67}$ | $\frac{0.90}{0.87} / \frac{0.10}{0.22} / \frac{0.51}{0.62}$ | $\frac{0.89}{0.87} / \frac{0.12}{0.15} / \frac{0.65}{0.51}$ | $\frac{0.94}{0.99} / \frac{0.09}{0.26} / \frac{0.51}{0.66}$ | $\frac{0.89}{0.84} / \frac{0.08}{0.21} / \frac{0.70}{0.58}$ | -                                                           | -                                                           | -                                                           |
| eTMDP                                          | $\frac{1.23}{1.09} / \frac{0.27}{0.25} / \frac{0.56}{0.52}$ | $\frac{1.14}{0.96} / \frac{0.31}{0.09} / \frac{0.51}{0.52}$ | $\frac{1.02}{0.90} / \frac{0.36}{0.23} / \frac{0.55}{0.45}$ | $\frac{1.06}{1.02} / \frac{0.57}{0.27} / \frac{0.45}{0.59}$ | $\frac{0.99}{0.84} / \frac{0.26}{0.11} / \frac{0.53}{0.58}$ | $\frac{1.07}{0.98} / \frac{0.44}{0.07} / \frac{0.52}{0.64}$ | -                                                           | -                                                           |
| ETMDP                                          | $\frac{0.88}{0.95} / \frac{0.08}{0.28} / \frac{1.11}{0.98}$ | $\frac{0.86}{0.87} / \frac{0.09}{0.16} / \frac{0.53}{0.52}$ | $\frac{0.86}{0.88} / \frac{0.09}{0.16} / \frac{0.55}{0.52}$ | $\frac{0.90}{0.99} / \frac{0.08}{0.29} / \frac{0.49}{0.70}$ | $\frac{0.86}{0.85} / \frac{0.09}{0.18} / \frac{0.60}{0.85}$ | $\frac{1.04}{1.12} / \frac{0.07}{0.10} / \frac{0.61}{0.74}$ | $\frac{0.94}{1.07} / \frac{0.06}{0.35} / \frac{0.48}{0.56}$ | -                                                           |
| eETMDP                                         | $\frac{1.14}{0.94} / \frac{0.47}{0.02} / \frac{0.58}{0.66}$ | $\frac{1.09}{0.88} / \frac{0.61}{0.00} / \frac{0.80}{0.69}$ | $\frac{1.08}{0.89} / \frac{0.61}{0.01} / \frac{0.80}{0.47}$ | $\frac{1.19}{1.03} / \frac{0.81}{0.09} / \frac{0.48}{0.53}$ | $\frac{1.12}{0.87} / \frac{0.57}{0.02} / \frac{0.88}{0.57}$ | $\frac{1.26}{1.13} / \frac{0.68}{0.01} / \frac{0.90}{0.69}$ | $\frac{1.18}{1.13} / \frac{0.62}{0.05} / \frac{0.51}{0.46}$ | $\frac{1.27}{1.06} / \frac{0.62}{0.01} / \frac{0.58}{0.74}$ |

**Table 9** Pairwise comparison of gap values ( $\frac{A}{B}$ ) for relaxation algorithms in three groups

| $\begin{smallmatrix} B \\ A \end{smallmatrix}$ | MPCC                                                        | WDP                                                         | MDP                                                         | eMDP                                                        | TWDP                                                        | TMDP                                                        | eTMDP                                                       | ETMDP                                                       |
|------------------------------------------------|-------------------------------------------------------------|-------------------------------------------------------------|-------------------------------------------------------------|-------------------------------------------------------------|-------------------------------------------------------------|-------------------------------------------------------------|-------------------------------------------------------------|-------------------------------------------------------------|
| WDP                                            | $\frac{0.18}{0.28} / \frac{0.67}{0.71} / \frac{0.21}{0.22}$ | -                                                           | -                                                           | -                                                           | -                                                           | -                                                           | -                                                           | -                                                           |
| MDP                                            | $\frac{0.09}{0.27} / \frac{0.52}{0.59} / \frac{0.29}{0.22}$ | $\frac{0.27}{0.31} / \frac{0.50}{0.50} / \frac{0.08}{0.31}$ | -                                                           | -                                                           | -                                                           | -                                                           | -                                                           | -                                                           |
| eMDP                                           | $\frac{0.48}{0.21} / \frac{0.77}{0.72} / \frac{0.33}{0.16}$ | $\frac{0.53}{0.17} / \frac{0.74}{0.65} / \frac{0.22}{0.52}$ | $\frac{0.51}{0.12} / \frac{0.57}{0.50} / \frac{0.33}{0.29}$ | -                                                           | -                                                           | -                                                           | -                                                           | -                                                           |
| TWDP                                           | $\frac{0.05}{0.31} / \frac{0.54}{0.59} / \frac{0.18}{0.31}$ | $\frac{0.12}{0.25} / \frac{0.50}{0.49} / \frac{0.10}{0.41}$ | $\frac{0.16}{0.32} / \frac{0.50}{0.50} / \frac{0.14}{0.31}$ | $\frac{0.16}{0.64} / \frac{0.51}{0.57} / \frac{0.13}{0.40}$ | -                                                           | -                                                           | -                                                           | -                                                           |
| TMDP                                           | $\frac{0.14}{0.29} / \frac{0.50}{0.58} / \frac{0.20}{0.28}$ | $\frac{0.33}{0.28} / \frac{0.48}{0.49} / \frac{0.09}{0.42}$ | $\frac{0.25}{0.23} / \frac{0.48}{0.50} / \frac{0.14}{0.22}$ | $\frac{0.17}{0.59} / \frac{0.48}{0.57} / \frac{0.18}{0.31}$ | $\frac{0.37}{0.16} / \frac{0.47}{0.51} / \frac{0.09}{0.14}$ | -                                                           | -                                                           | -                                                           |
| eTMDP                                          | $\frac{0.69}{0.20} / \frac{0.61}{0.58} / \frac{0.23}{0.31}$ | $\frac{0.62}{0.18} / \frac{0.61}{0.50} / \frac{0.22}{0.72}$ | $\frac{0.70}{0.11} / \frac{0.60}{0.50} / \frac{0.28}{0.41}$ | $\frac{0.40}{0.21} / \frac{0.57}{0.56} / \frac{0.13}{0.38}$ | $\frac{0.83}{0.15} / \frac{0.61}{0.51} / \frac{0.28}{0.25}$ | $\frac{0.63}{0.16} / \frac{0.60}{0.48} / \frac{0.21}{0.28}$ | -                                                           | -                                                           |
| ETMDP                                          | $\frac{0.06}{0.28} / \frac{0.49}{0.58} / \frac{0.18}{0.30}$ | $\frac{0.27}{0.37} / \frac{0.47}{0.49} / \frac{0.08}{0.44}$ | $\frac{0.17}{0.23} / \frac{0.47}{0.50} / \frac{0.11}{0.41}$ | $\frac{0.18}{0.60} / \frac{0.46}{0.57} / \frac{0.11}{0.42}$ | $\frac{0.22}{0.13} / \frac{0.46}{0.50} / \frac{0.16}{0.17}$ | $\frac{0.13}{0.25} / \frac{0.46}{0.47} / \frac{0.12}{0.28}$ | $\frac{0.14}{0.73} / \frac{0.47}{0.60} / \frac{0.30}{0.40}$ | -                                                           |
| eETMDP                                         | $\frac{0.46}{0.03} / \frac{0.77}{0.56} / \frac{0.46}{0.05}$ | $\frac{0.47}{0.02} / \frac{0.90}{0.65} / \frac{0.43}{0.61}$ | $\frac{0.58}{0.03} / \frac{0.75}{0.50} / \frac{0.58}{0.51}$ | $\frac{0.33}{0.30} / \frac{0.91}{0.71} / \frac{0.36}{0.12}$ | $\frac{0.61}{0.02} / \frac{0.77}{0.51} / \frac{0.63}{0.02}$ | $\frac{0.54}{0.03} / \frac{0.76}{0.48} / \frac{0.56}{0.11}$ | $\frac{0.30}{0.34} / \frac{0.76}{0.59} / \frac{0.58}{0.04}$ | $\frac{0.66}{0.03} / \frac{0.76}{0.47} / \frac{0.64}{0.01}$ |
