# Supplementary material
Source: Atypon-hosted journal article supplement (doi:10.1287/ijoc.2025.1159)
Supplement: ijoc.2025.1159.cd.zip [file Table_10-11_Pairwise_comparison_of_ratios_(dominant_casesgaps)_for_direct&relaxation_algorithms_with_450_examples.pdf › 2025.1159-main/results/Table_10-11_Pairwise_comparison_of_ratios_(dominant_casesgaps)_for_direct&relaxation_algorithms_with_450_examples.pdf]

**Table 10** Pairwise comparison of ratios  $\frac{A}{B}$  (dominant cases/gaps) for direct algorithms with 450 examples

| $\begin{smallmatrix} B \\ A \end{smallmatrix}$ | MPCC      | WDP       | MDP       | eMDP      | TWDP      | TMDP      | eTMDP     | ETMDP     |
|------------------------------------------------|-----------|-----------|-----------|-----------|-----------|-----------|-----------|-----------|
| WDP                                            | 1.27/0.84 | -         | -         | -         | -         | -         | -         | -         |
| MDP                                            | 1.29/0.83 | 0.98/0.94 | -         | -         | -         | -         | -         | -         |
| eMDP                                           | 0.84/1.05 | 0.54/1.11 | 0.55/1.22 | -         | -         | -         | -         | -         |
| TWDP                                           | 1.48/0.89 | 1.11/0.91 | 0.95/1.07 | 1.79/0.82 | -         | -         | -         | -         |
| TMDP                                           | 1.50/0.90 | 1.17/0.88 | 1.09/1.08 | 1.80/0.81 | 1.07/1.02 | -         | -         | -         |
| eTMDP                                          | 0.87/1.11 | 0.59/1.25 | 0.60/1.22 | 1.02/1.11 | 0.58/1.16 | 0.90/1.25 | -         | -         |
| ETMDP                                          | 1.50/0.94 | 1.22/0.70 | 1.19/0.96 | 1.99/0.74 | 1.21/0.93 | 1.78/0.92 | 1.87/0.75 | -         |
| eETMDP                                         | 0.21/1.35 | 0.10/1.59 | 0.12/1.82 | 0.38/1.50 | 0.11/1.76 | 0.21/1.56 | 0.12/1.41 | 0.10/1.36 |

**Table 11** Pairwise comparison of ratios  $\frac{A}{B}$  (dominant cases/gaps) for relaxation algorithms with 450 examples

| $\begin{smallmatrix} B \\ A \end{smallmatrix}$ | MPCC      | WDP       | MDP       | eMDP      | TWDP      | TMDP       | eTMDP     | ETMDP     |
|------------------------------------------------|-----------|-----------|-----------|-----------|-----------|------------|-----------|-----------|
| WDP                                            | 4.72/0.88 | -         | -         | -         | -         | -          | -         | -         |
| MDP                                            | 4.88/0.83 | 0.99/0.76 | -         | -         | -         | -          | -         | -         |
| eMDP                                           | 2.40/1.45 | 0.37/1.11 | 0.34/1.55 | -         | -         | -          | -         | -         |
| TWDP                                           | 4.09/0.64 | 0.83/0.63 | 0.85/0.71 | 2.65/0.50 | -         | -          | -         | -         |
| TMDP                                           | 4.14/0.73 | 0.83/0.76 | 0.85/0.92 | 2.58/0.56 | 0.97/1.15 | -          | -         | -         |
| eTMDP                                          | 2.28/1.40 | 0.39/1.04 | 0.34/1.55 | 1.00/0.96 | 0.40/1.89 | 0.62/3.27  | -         | -         |
| ETMDP                                          | 2.19/0.63 | 0.81/0.63 | 0.78/0.66 | 1.56/0.47 | 0.84/1.05 | 1.29/1.34  | 1.51/0.53 | -         |
| eETMDP                                         | 1.87/2.64 | 0.26/1.41 | 0.22/1.84 | 0.55/1.42 | 0.23/3.65 | 0.31/13.29 | 0.59/1.69 | 0.43/4.04 |
